# Supplementary material for: Cellulose nanocrystal reinforced conductive hydrogels with anti-freezing properties for strain sensors
Source: Royal Society of Chemistry journal article supplement (doi:10.1039/d2nj04726h), 2022-01-01
Supplement: d2nj04726h1.pdf [file d2nj04726h1.pdf]

## Supporting Information

### Cellulose Nanocrystal Reinforced Hydrogel with Anti-Freezing Properties for Strain Sensor

*Jiawen Zheng<sup>a</sup>, Yong Sun<sup>a,b,\*</sup>, Shuliang Yang<sup>a</sup>, Zheng Li<sup>a</sup>, Xing Tang<sup>a,b</sup>, Xianhai Zeng<sup>a,b</sup>, Lu Lin<sup>a,b</sup>*

<sup>a</sup> Xiamen Key Laboratory of Clean and High-valued Applications of Biomass, College of Energy, Xiamen University, Xiamen 361102, China.

<sup>b</sup> Fujian Engineering and Research Center of Clean and High-valued Technologies for Biomass, Xiamen University, Xiamen 361102, China.

\* Corresponding author.

Yong Sun

Email: [sunyong@xmu.edu.cn](mailto:sunyong@xmu.edu.cn)

Tel.: 00-86-592-5952786; Fax: 00-86-592-5952786

**Table S1.** Feed information of AA solution and PVA solution for IPN hydrogel formation

| Samples            | AA<br>(g) | PVA<br>(g) | H <sub>2</sub> O<br>(g) | Ethylene glycol<br>(g) | Fe <sup>3+</sup><br>(mmol) | CNCs<br>(mg) | APS<br>(mg) | MBAA<br>(mg) |
|--------------------|-----------|------------|-------------------------|------------------------|----------------------------|--------------|-------------|--------------|
| PVA/PAA            | 6         | 2          | 10                      | 10                     | /                          | /            | 50          | 20           |
| PVA/PAA/CNC-5      | 6         | 2          | 10                      | 10                     | /                          | 5            | 50          | 20           |
| PVA/PAA/CNC-10     | 6         | 2          | 10                      | 10                     | /                          | 10           | 50          | 20           |
| PVA/PAA/CNC-15     | 6         | 2          | 10                      | 10                     | /                          | 15           | 50          | 20           |
| PVA/PAA/CNC-20     | 6         | 2          | 10                      | 10                     | /                          | 20           | 50          | 20           |
| PVA/PAA/CNC-30     | 6         | 2          | 10                      | 10                     | /                          | 30           | 50          | 20           |
| PVA/PAA//Fe-50     | 6         | 2          | 10                      | 10                     | 0.3                        | /            | 50          | 20           |
| PVA/PAA//Fe-100    | 6         | 2          | 10                      | 10                     | 0.6                        | /            | 50          | 20           |
| PVA/PAA//Fe-150    | 6         | 2          | 10                      | 10                     | 0.9                        | /            | 50          | 20           |
| PVA/PAA//Fe-300    | 6         | 2          | 10                      | 10                     | 1.8                        | /            | 50          | 20           |
| PVA/PAA/CNC/Fe-100 | 6         | 2          | 10                      | 10                     | 0.6                        | 10           | 50          | 20           |

**Table S2.** Mechanical properties of various similar hydrogels

| Hydrogel materials  | Elongation (%) | Tensile Strength (kPa) | Toughness (KJ/m <sup>3</sup> ) | Elastic modulus (KPa) | Ionic conductivity (S/m) | Ref.      |
|---------------------|----------------|------------------------|--------------------------------|-----------------------|--------------------------|-----------|
| PVA/PAA/CNC/Fe      | 756            | 519                    | 179.342                        | 0.69                  | 1.54                     | This work |
| GO/PEDOT:PSS/PNIPAM | 2512           | 29                     | N/G                            | N/G                   | 0.084                    | [1]       |
| PNIPAAm/PANI        | 290            | 42                     | N/G                            | N/G                   | 0.068                    | [2]       |
| MXene/PVA/PAAm      | 1000           | 35                     | N/G                            | N/G                   | N/G                      | [3]       |
| PAAm/PEDOT:PSS      | 525            | 30                     | N/G                            | 80                    | 1.000                    | [4]       |
| PAA/TA@CNC/Al       | 2952           | 256                    | 5600                           | 48                    | N/G                      | [5]       |
| PEG/PAM/PAA/Fe      | 1350           | 360                    | 458                            | N/G                   | 0.006                    | [6]       |
| PAA/PANI/Fe         | 991            | 35.68                  | N/G                            | N/G                   | N/G                      | [7]       |
| PAM/PVAA/Fe         | 600            | 370                    | N/G                            | N/G                   | N/G                      | [8]       |
| PAA/CNF/Fe          | 1803           | 1370                   | 11.05                          | N/G                   | N/G                      | [9]       |
| pRGO/PB/TA@CNC      | 869            | 245                    | N/G                            | N/G                   | 0.0175                   | [10]      |

Note: 'N/G' indicates 'not given' in the references.

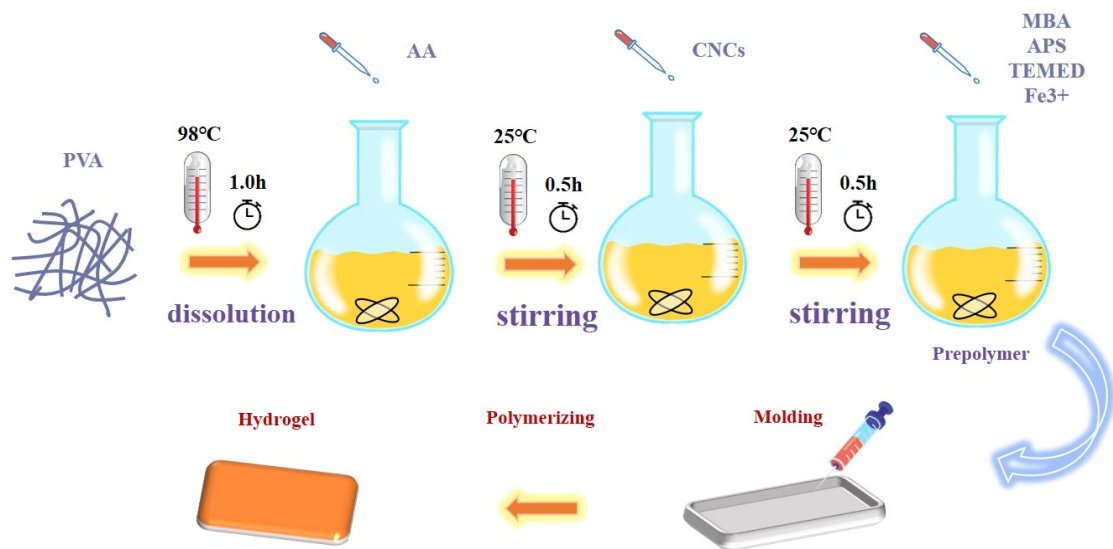

Fig. S1. Preparation of the PVA/PAA/CNC/Fe<sup>3+</sup> hydrogel.

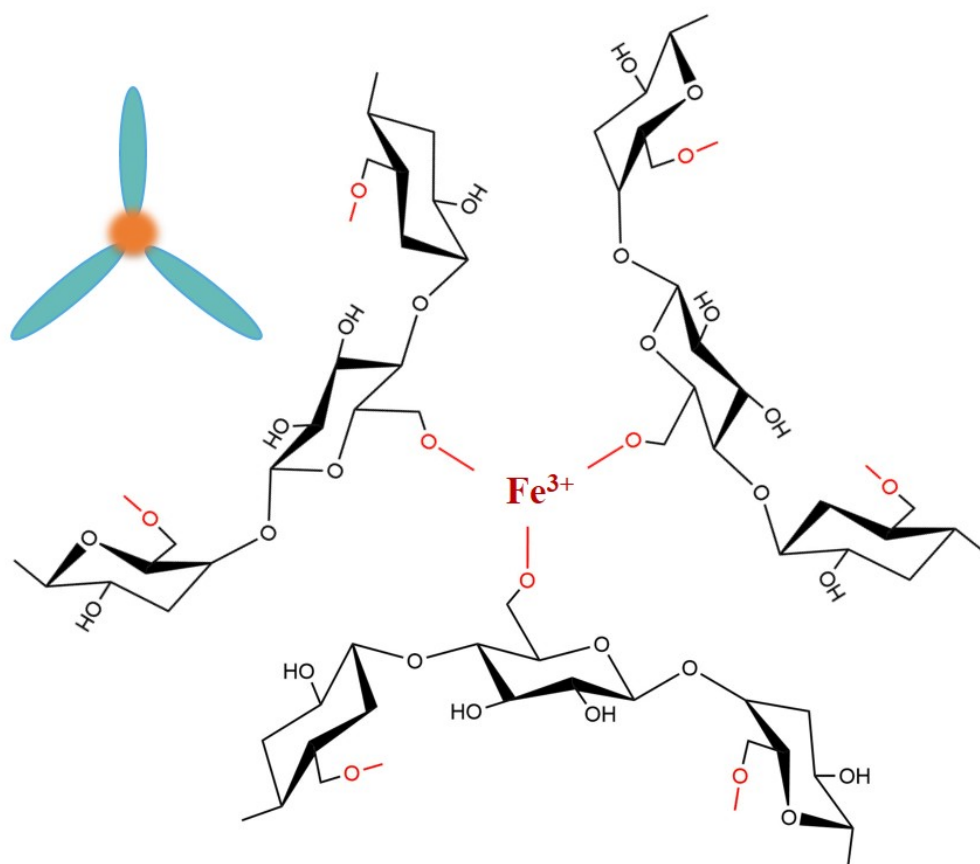

Fig. S2. CNCs-Fe<sup>3+</sup> binding unit.

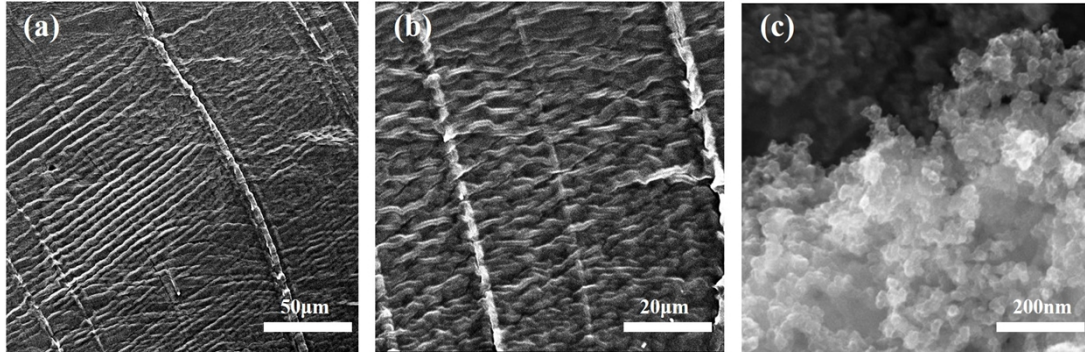

Fig. S3. SEM image of the PVA/PAA/CNC/Fe<sup>3+</sup> hydrogel

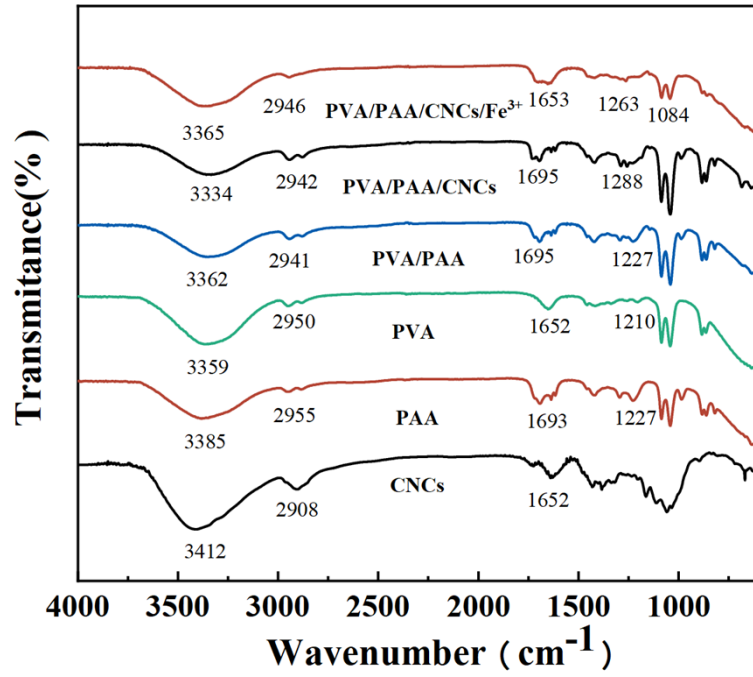

Fig. S4. FTIR spectra of the PAA, PVA, CNCs, PVA/PAA, PVA/PAA/CNC and PVA/PAA/CNC/Fe<sup>3+</sup> hydrogel

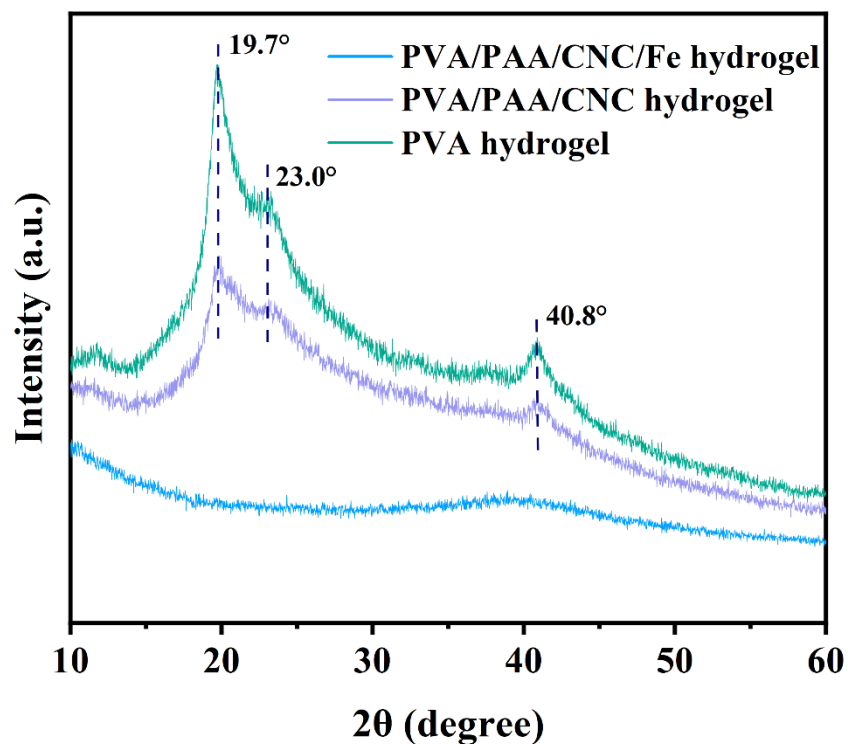

Fig. S5. X-ray diffraction profiles of the PVA, PVA/PAA/CNC, and PVA/PAA/CNC/Fe<sup>3+</sup> hydrogels.

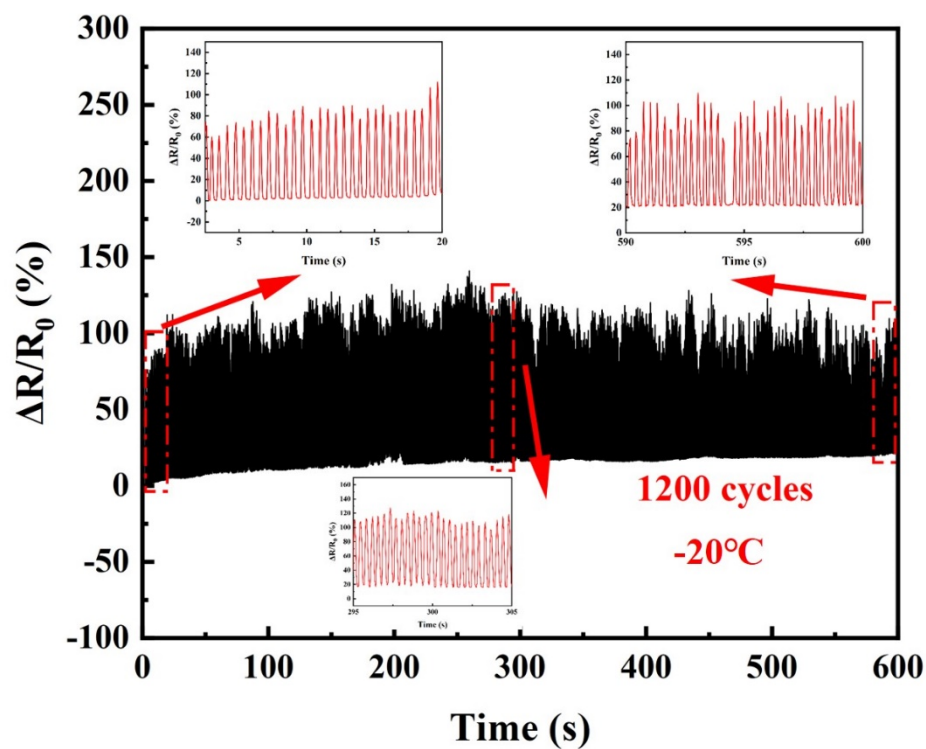

Fig. S6. The PVA/PAA/CNC/Fe<sup>3+</sup> hydrogel was subjected to 1200 cycles of the tensile test at low temperature.

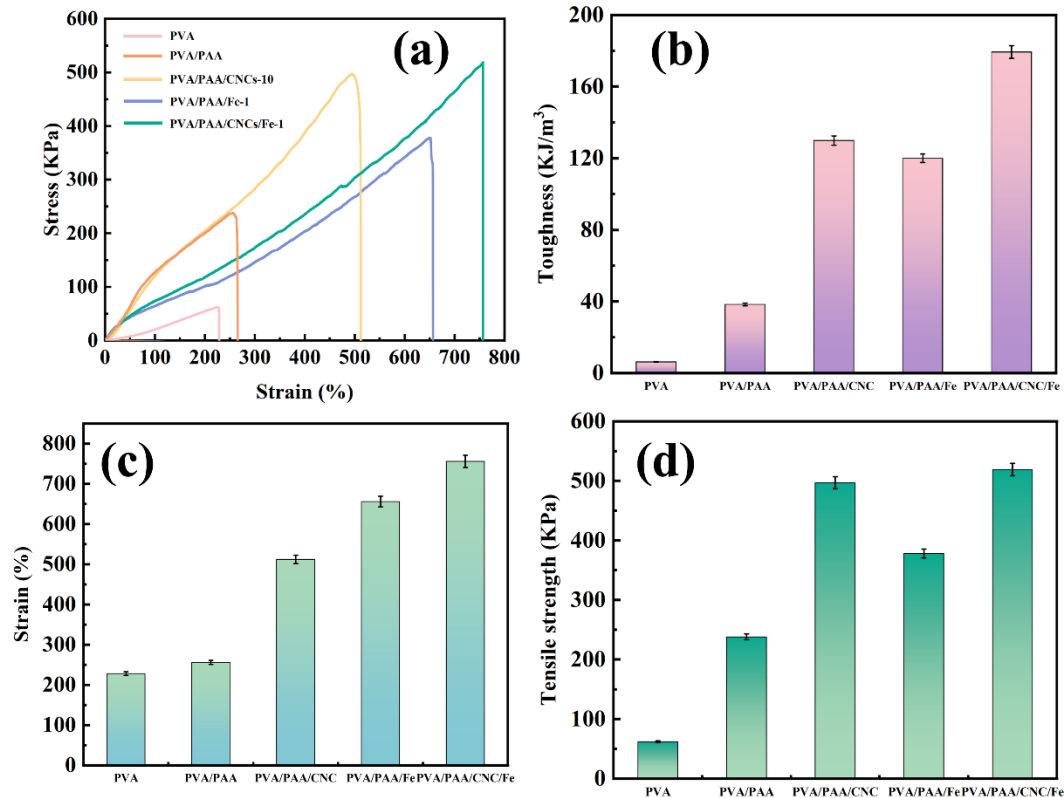

**Fig. S7.** Tensile tests of IPN hydrogels: (a) Typical stress-train curves of different hydrogels; Toughness (b), Strain (c), and Tensile strength (d) of different hydrogels.

When only  $\text{Fe}^{3+}$  was added, the tensile length of PVA/PAA/Fe increased significantly from 256% to 656%, which was higher than 512% of PVA/PAA/CNC, but the tensile strength and toughness were only 378 KPa and 119 KJ/m<sup>3</sup>, which was lower than 497 KPa and 129 KJ/m<sup>3</sup> of PVA/PAA/CNC, these changes demonstrated that hydrogen bonds and ionic coordinate bonds could improve the mechanical properties of hydrogels together.

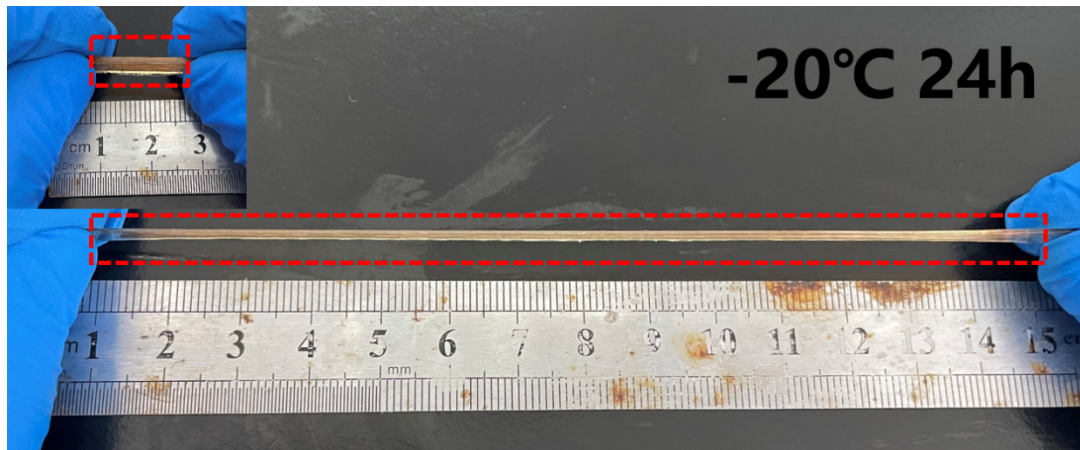

**Fig. S8.** Highly stretched after 24 h of freezing.

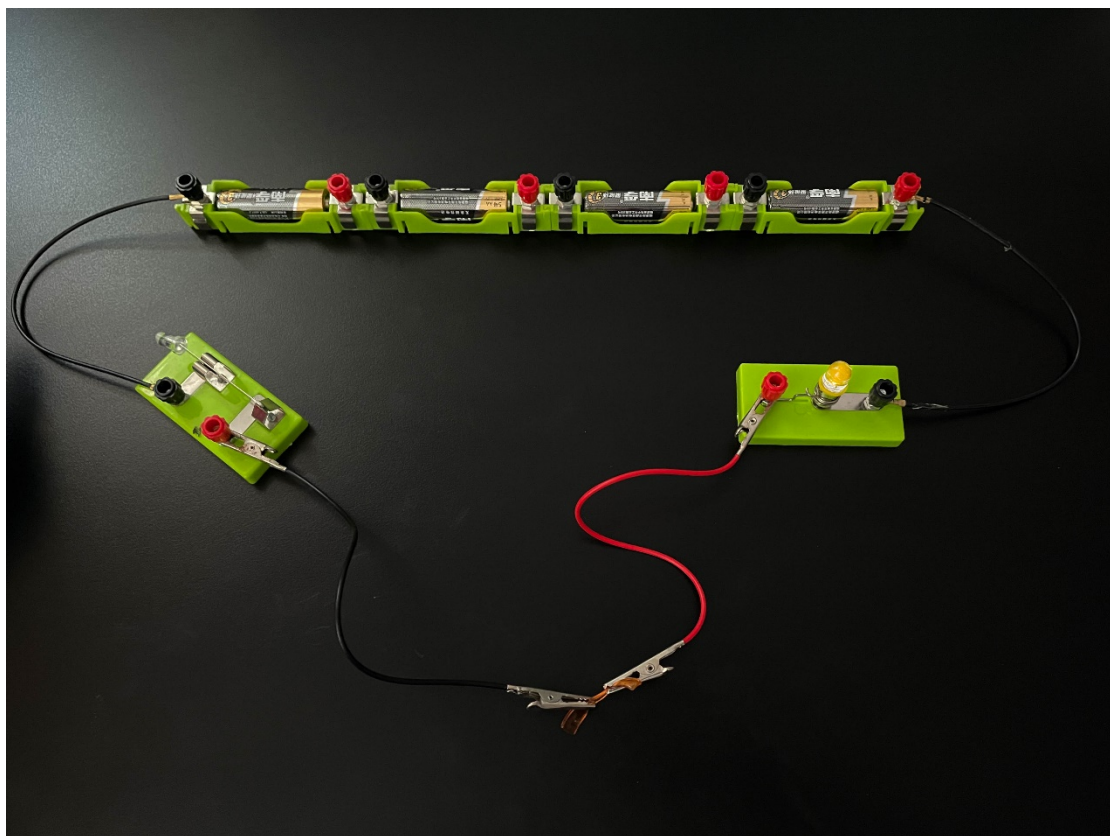

**Fig. S9.** The PVA/PAA/CNC/Fe<sup>3+</sup> hydrogel could be electrically conductive at -20 °C.



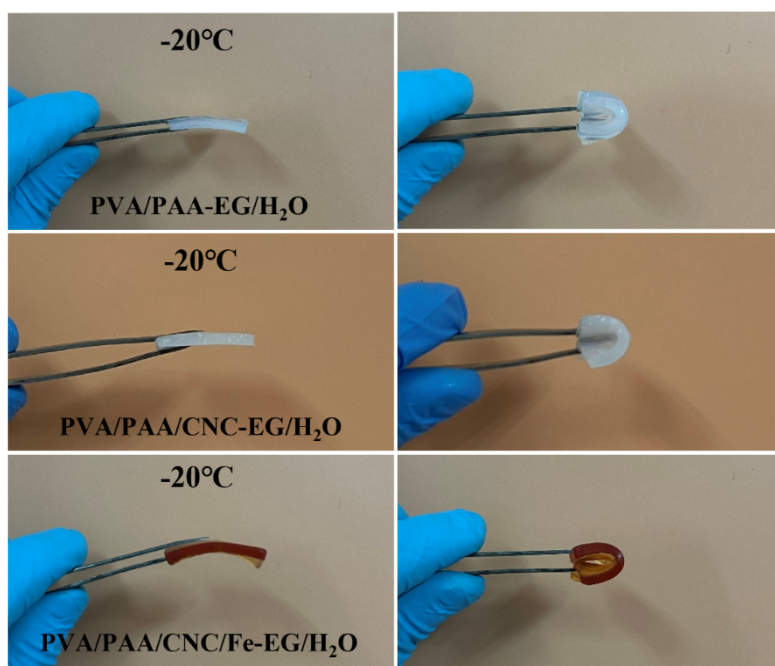

**Fig. S10.** PVA/PAA, PVA/PAA/CNC, and PVA/PAA/CNC/Fe hydrogels can be bent after being frozen at  $-20^{\circ}\text{C}$  for 24 hours.

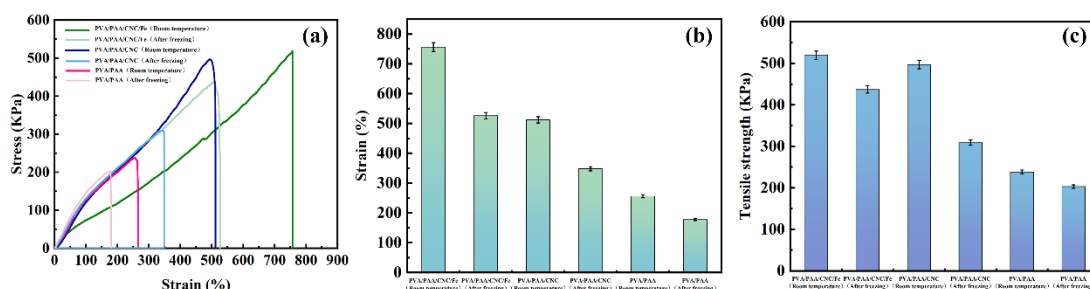

**Fig. S11.** Tensile tests of PVA/PAA, PVA/PAA/CNC, and PVA/PAA/CNC/Fe hydrogels at room temperature and after freezing: (a) Typical stress-strain curves of different hydrogels; Strain (b), Tensile strength (c) of different hydrogels.

The tensile strain and tensile strength of different hydrogels decreased to different degrees after 24 hours of freezing at  $-20^{\circ}\text{C}$ . The tensile length of PVA/PAA/CNC/Fe<sup>3+</sup>, PVA/PAA/CNC, and PVA/PAA hydrogels decreased to 69.5%, 67.9%, and 69.5% of that at room temperature, respectively. It can be seen that the addition of CNC and Fe<sup>3+</sup> had little effect on the tensile length at low temperatures. At the same time, the tensile strength decreased to 84.2%, 77.0%, and 85.2% of that at room temperature. When only CNC was added, the tensile strength of hydrogel decreased more at low temperature.

## Reference

- [1] H. Zhang, M. Yue, T. Wang, J. Wang, X. Wu, S. Yang, *New Journal of Chemistry*, 2021, **45**, 4647-4657.
- [2] Z. Wang, H. Zhou, W. Chen, Q. Li, B. Yan, X. Jin, A. Ma, H. Liu, W. Zhao, *ACS Appl. Mater. Interfaces*, 2018, **10**, 14045-14054.
- [3] H. Liao, X. Guo, P. Wan and G. Yu, *Advanced Functional Materials*, 2019, **29**.
- [4] Y. Y. Lee, H. Y. Kang, S. H. Gwon, G. M. Choi, S. M. Lim, J. Y. Sun and Y. C. Joo, *Adv. Mater.*, 2016, **28**, 1636-1643.
- [5] C. Shao, M. Wang, L. Meng, H. Chang, B. Wang, F. Xu, J. Yang and P. Wan, *Chemistry of Materials*, 2018, **30**, 3110-3121.
- [6] S. Liu, O. Oderinde, I. Hussain, F. Yao and G. Fu, *Polymer*, 2018, **144**, 111-120.
- [7] G. Ge, Y. Lu, X. Qu, W. Zhao, Y. Ren, W. Wang, Q. Wang, W. Huang and X. Dong, *ACS Nano*, 2020, **14**, 218-228.
- [8] J. Tie, L. Rong, H. Liu, B. Wang, Z. Mao, L. Zhang, Y. Zhong, X. Feng, X. Sui and H. Xu, *Polymer Chemistry*, 2020, **11**, 1327-1336.
- [9] C. Shao, H. Chang, M. Wang, F. Xu and J. Yang, *ACS Appl. Mater. Interfaces*, 2017, **9**, 28305-28318.
- [10] X. Liu, Y. Ma, X. Zhang and J. Huang, *Colloids and Surfaces, A: Physicochemical and Engineering Aspects*, 2021, **613**.
